# Supplementary material for: A Comparative Study of Electronic, Optical, and Thermoelectric Properties of Zn-Doped Bulk and Monolayer SnSe Using Ab Initio Calculations
Source: MDPI journal article supplement (doi:10.3390/nano13142084), 2023-07-16
Supplement: s1 [file s1]

# Supplementary Materials

## A Comparative Study of Electronic, Optical, and Thermoelectric Properties of Zn-Doped Bulk and Monolayer SnSe Using Ab Initio Calculations

Najwa Al Bouzieh <sup>1</sup>, Muhammad Atif Sattar <sup>1,2</sup>, Maamar Benkraouda <sup>1</sup>, and Nouredine Amrane <sup>1,\*</sup>

<sup>1</sup> Physics Department, College of Science, United Arab Emirates University (UAEU), Al Ain 15551, United Arab Emirates

<sup>2</sup> National Water and Energy Center (NWECC), United Arab Emirates University (UAEU), Al Ain 15551, United Arab Emirates

\* Correspondence: namrane@uaeu.ac.ae

### 3.1 Structural Properties

**Table S1.** DFT-calculated bond angles of bulk  $\alpha$ -SnSe compounds.

| Structure                                     | $\alpha$ | $\beta$ | $\gamma$ |
|-----------------------------------------------|----------|---------|----------|
| $\alpha - \text{SnSe}$                        | 90.02    | 89.88   | 89.97    |
| $\text{Zn}_{0.06} \text{Sn}_{0.94} \text{Se}$ | 90.00    | 90.10   | 90.00    |
| $\text{Zn}_{0.13} \text{Sn}_{0.87} \text{Se}$ | 90.03    | 90.24   | 90.22    |
| $\text{Zn}_{0.19} \text{Sn}_{0.81} \text{Se}$ | 90.00    | 90.26   | 90.00    |
| $\text{Zn}_{0.25} \text{Sn}_{0.75} \text{Se}$ | 90.64    | 90.92   | 90.00    |

**Table S2.** DFT-calculated bond angles of monolayer  $\alpha$ -SnSe compounds.

| Structure                                     | $\alpha$ | $\beta$ | $\gamma$ |
|-----------------------------------------------|----------|---------|----------|
| $\alpha - \text{SnSe}$                        | 90.00    | 90.00   | 90.00    |
| $\text{Zn}_{0.06} \text{Sn}_{0.94} \text{Se}$ | 89.34    | 90.00   | 90.00    |
| $\text{Zn}_{0.11} \text{Sn}_{0.89} \text{Se}$ | 88.74    | 90.00   | 90.00    |
| $\text{Zn}_{0.17} \text{Sn}_{0.83} \text{Se}$ | 88.17    | 90.13   | 90.11    |
| $\text{Zn}_{0.22} \text{Sn}_{0.78} \text{Se}$ | 87.59    | 90.00   | 90.00    |

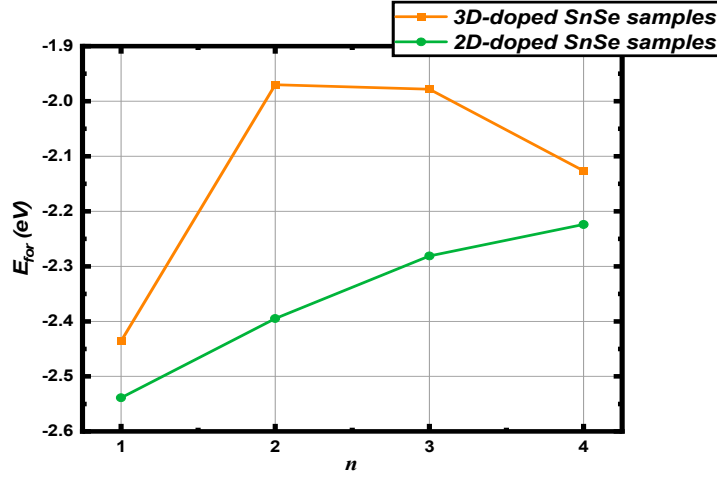

Figure S1: Variation of the formation energy of doped SnSe structures with respect to the number of Zn dopant atoms.

### 3.2 Electronic Properties

Table S3: Effective Masses ( $m^*$ ) of Charge Carriers at Valence Band Maximum (VBM) and the Conduction Band Minimum (CBM) for the 2D SnSe systems.

|                                              | VBM/ $m_h$                      | CBM/ $m_e$                      |
|----------------------------------------------|---------------------------------|---------------------------------|
| $\alpha - \text{SnSe}$                       | 0.193 ( $\Gamma$ )<br>0.155 (X) | 0.158 (X)<br>0.152 ( $\Gamma$ ) |
| $\text{Zn}_{0.06} \text{Sn}_{0.94}\text{Se}$ | 0.639 ( $\Gamma$ -X)            | 0.220 (X)<br>0.188 ( $\Gamma$ ) |
| $\text{Zn}_{0.11} \text{Sn}_{0.89}\text{Se}$ | 1.033 ( $\Gamma$ -X)            | 2.417 (X)<br>0.418 ( $\Gamma$ ) |
| $\text{Zn}_{0.17} \text{Sn}_{0.83}\text{Se}$ | 0.889 ( $\Gamma$ -X)            | 0.499 ( $\Gamma$ )              |
| $\text{Zn}_{0.22} \text{Sn}_{0.78}\text{Se}$ | 0.621 ( $\Gamma$ -X)            | 0.224 ( $\Gamma$ )              |

Table S4: Effective Masses ( $m^*$ ) of Charge Carriers at Valence Band Maximum (VBM) and the Conduction Band Minimum (CBM) for the 3D SnSe systems.

|                                              | VBM/ $m_e$<br>(holes)           | CBM/ $m_e$<br>electrons         |
|----------------------------------------------|---------------------------------|---------------------------------|
| $\alpha - \text{SnSe}$                       | 1.085 (Z)<br>0.180 ( $\Gamma$ ) | 0.131 ( $\Gamma$ )<br>0.152 (Y) |
| $\text{Zn}_{0.06} \text{Sn}_{0.94}\text{Se}$ | 0.234 (Z)<br>0.337 ( $\Gamma$ ) | 0.218 ( $\Gamma$ )<br>0.236 (Y) |
| $\text{Zn}_{0.13} \text{Sn}_{0.87}\text{Se}$ | 0.258 (Z)<br>0.243 ( $\Gamma$ ) | 0.293 ( $\Gamma$ )<br>0.291 (Y) |
| $\text{Zn}_{0.19} \text{Sn}_{0.81}\text{Se}$ | 0.812 (Z)<br>0.944 ( $\Gamma$ ) | 0.453 ( $\Gamma$ )<br>0.257 (Y) |
| $\text{Zn}_{0.25} \text{Sn}_{0.75}\text{Se}$ | 0.735 (Z)<br>0.759 ( $\Gamma$ ) | 0.420 ( $\Gamma$ )<br>0.261 (Y) |

### 3.3 Optical properties

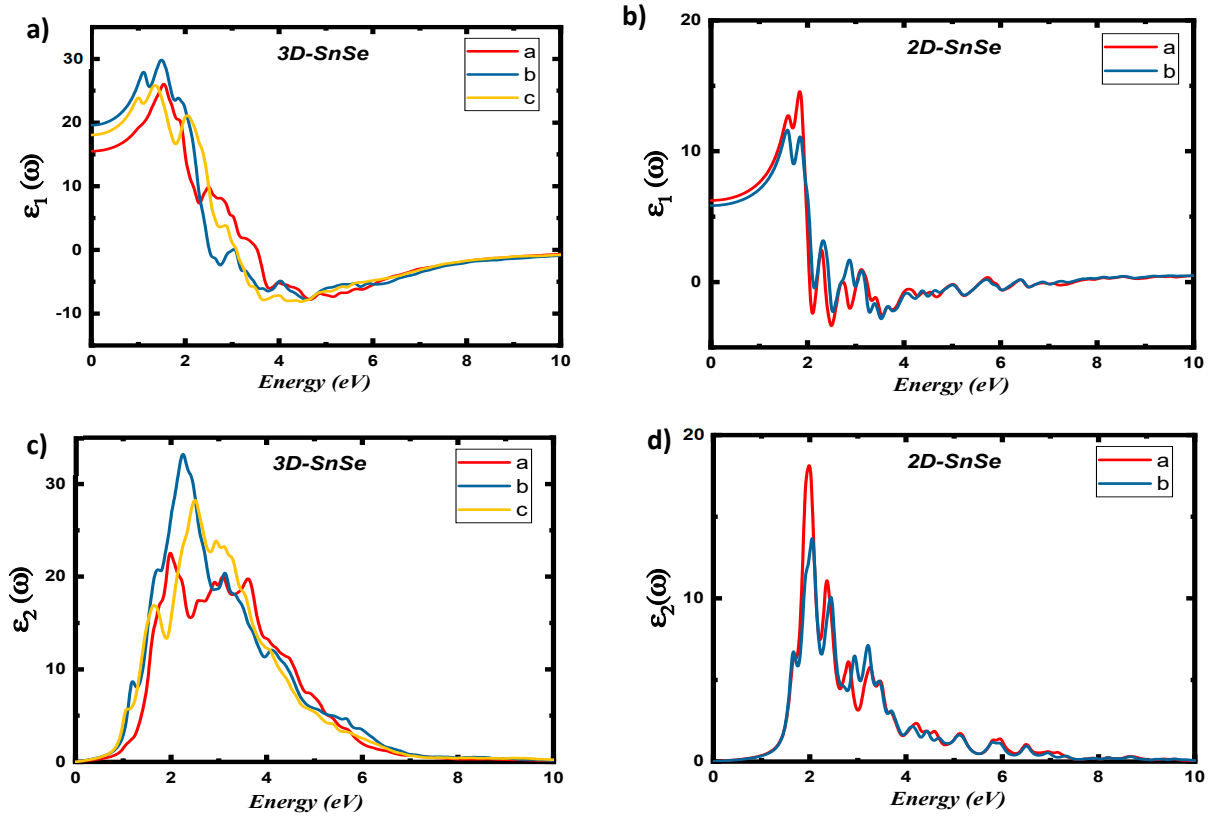

Figure S2: The measured real part  $\epsilon_1(\omega)$  of the dielectric constant (a and b) and the imaginary part  $\epsilon_2(\omega)$  of the dielectric constant (c and d) for 3D SnSe (left side) and 2D SnSe (right side).

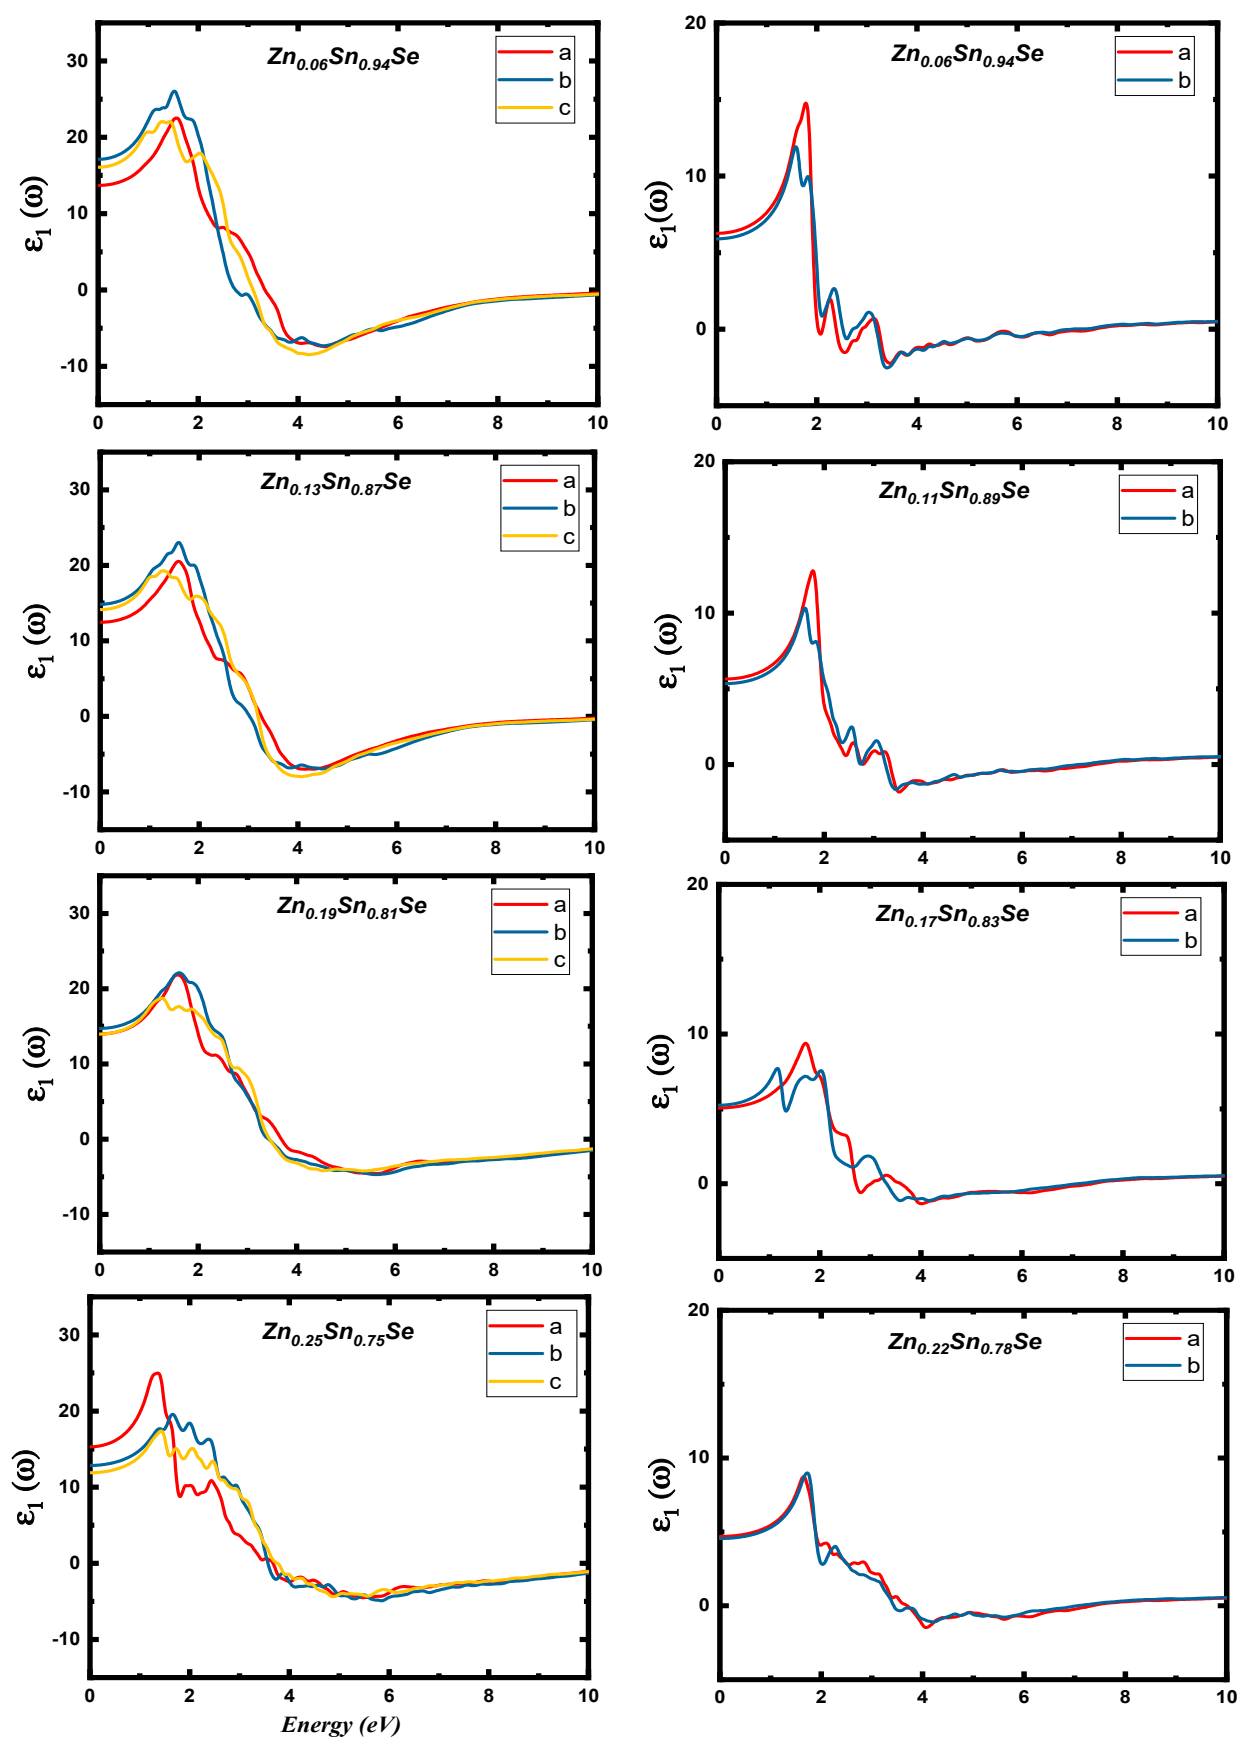

Figure S3: The measured real part  $\epsilon_1(\omega)$  of the dielectric constant for 3D SnSe doped structures (left side) and 2D SnSe doped structures (right side).

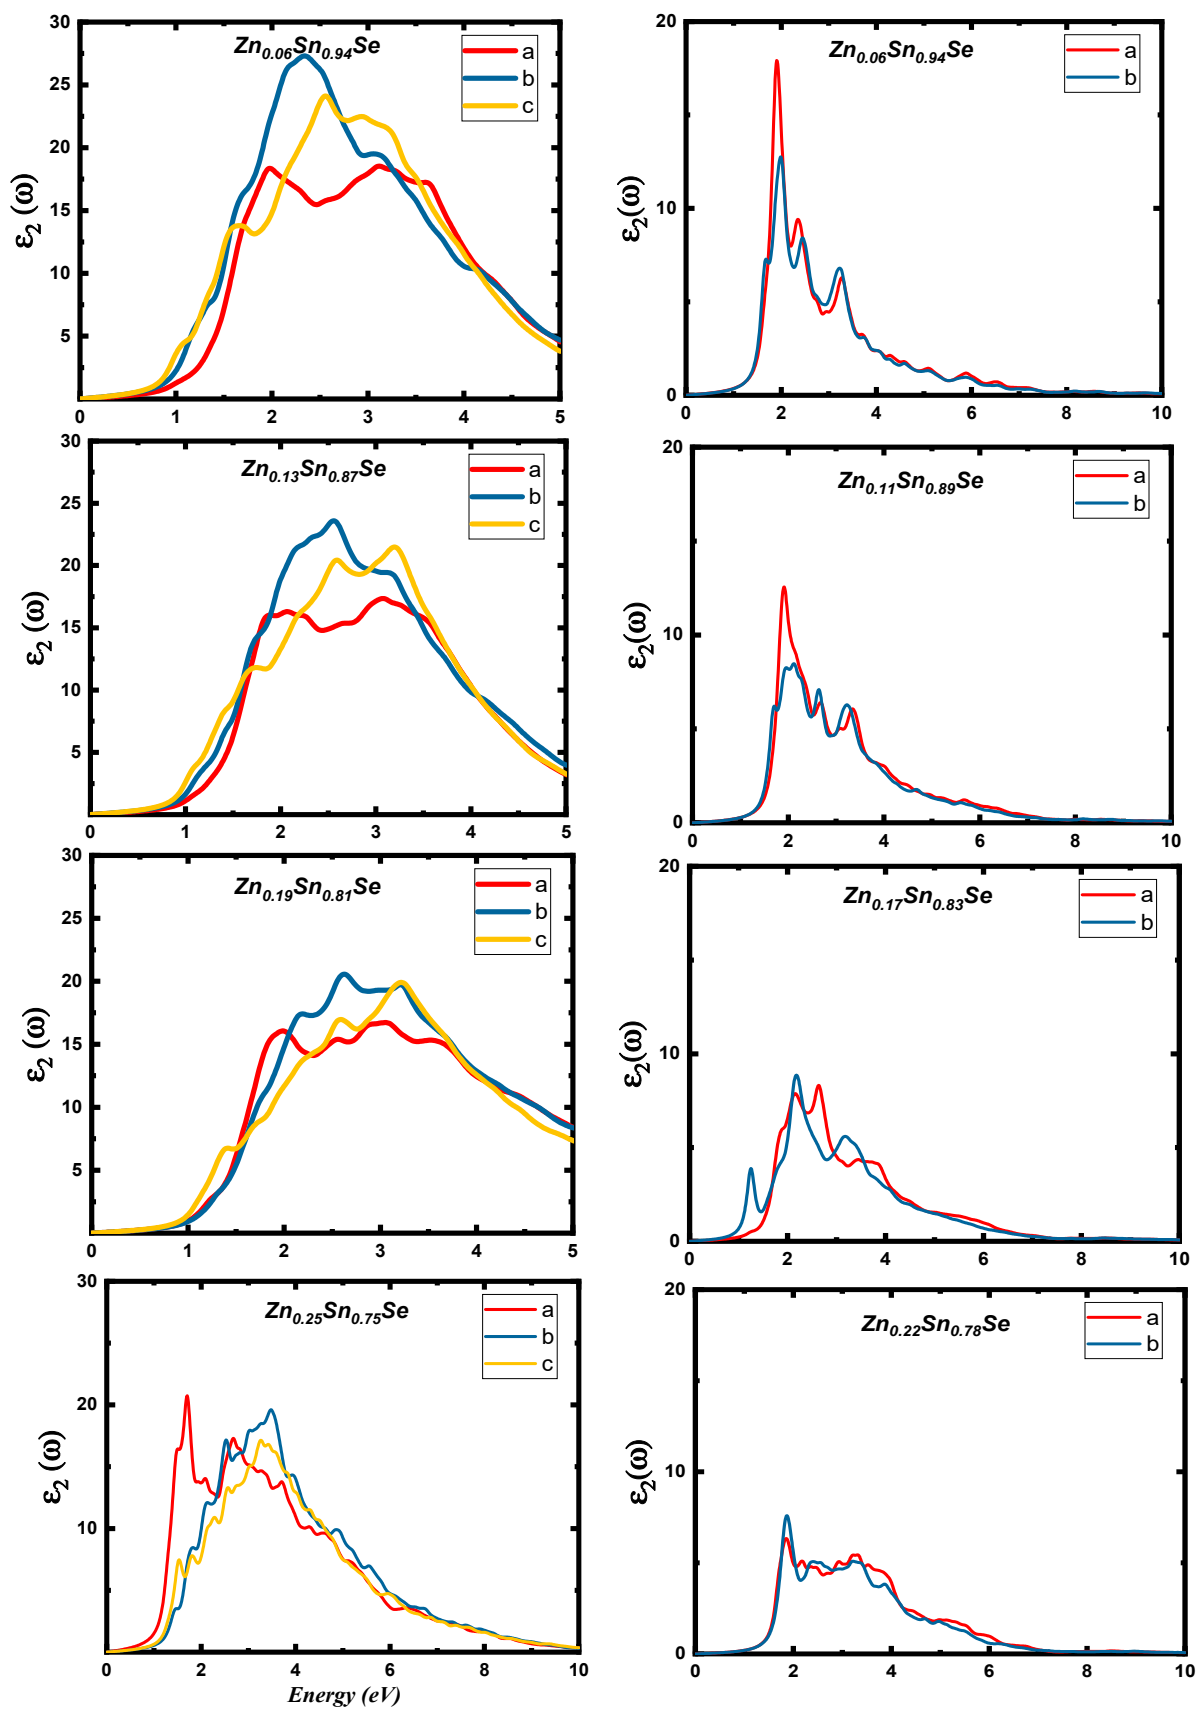

Figure S4: The measured imaginary part  $\epsilon_2(\omega)$  of the dielectric constant for 3D SnSe doped structures (left side) and 2D SnSe doped structures (right side).
